# Supplementary material for: COVID-19 School vs. Community-Based Outbreak Trends among New Jersey K–12 Schools during the 2020–2021 School Year
Source: MDPI journal article supplement (doi:10.3390/ijerph19159285), 2022-07-29
Supplement: s1 [file s1]

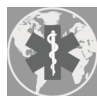

## Supplementary Materials

**Table S1.** Numbers of K-12 public school and private school students in the State of New Jersey (NJ) as reported in the American Community Survey (based on U.S. Census 2020) as of the end of the 2019–2020 school year [9].

|                              | Number of Public School Students by Age |               |               |               |               | Number of Private School Students by Age |              |              |              |              |
|------------------------------|-----------------------------------------|---------------|---------------|---------------|---------------|------------------------------------------|--------------|--------------|--------------|--------------|
|                              | 5–9 Years                               | 10–14 Years   | 15–17 Years   | 18–19 Years   | 20–24 Years   | 5–9 Years                                | 10–14 Years  | 15–17 Years  | 18–19 Years  | 20–24 Years  |
| <b>Northwest</b>             | <b>59196</b>                            | <b>75144</b>  | <b>43528</b>  | <b>20848</b>  | <b>25481</b>  | <b>6731</b>                              | <b>6069</b>  | <b>4700</b>  | <b>6610</b>  | <b>8709</b>  |
| Morris County                | 22983                                   | 28674         | 18564         | 7311          | 9469          | 2320                                     | 1875         | 1719         | 4038         | 4688         |
| Passaic County               | 26123                                   | 31847         | 16214         | 9737          | 10244         | 3007                                     | 3541         | 2631         | 1539         | 2712         |
| Sussex County                | 6053                                    | 8574          | 5154          | 2249          | 3474          | 685                                      | 280          | 217          | 122          | 777          |
| Warren County                | 4037                                    | 6049          | 3596          | 1551          | 2294          | 719                                      | 373          | 133          | 911          | 532          |
| <b>Northeast</b>             | <b>123458</b>                           | <b>132269</b> | <b>74762</b>  | <b>31765</b>  | <b>43209</b>  | <b>12815</b>                             | <b>13086</b> | <b>9565</b>  | <b>11208</b> | <b>21864</b> |
| Bergen County                | 44533                                   | 50067         | 31104         | 14023         | 18660         | 7356                                     | 6640         | 4913         | 3955         | 10588        |
| Essex County                 | 45342                                   | 51688         | 26645         | 10470         | 14858         | 2089                                     | 3882         | 2829         | 4058         | 4992         |
| Hudson County                | 33583                                   | 30514         | 17013         | 7272          | 9691          | 3370                                     | 2564         | 1823         | 3195         | 6284         |
| <b>Central West</b>          | <b>40500</b>                            | <b>45416</b>  | <b>28931</b>  | <b>16809</b>  | <b>17762</b>  | <b>4462</b>                              | <b>4978</b>  | <b>3798</b>  | <b>6575</b>  | <b>10123</b> |
| Hunterdon County             | 5830                                    | 6650          | 4621          | 2178          | 1412          | 280                                      | 587          | 645          | 211          | 1130         |
| Mercer County                | 17694                                   | 20566         | 12561         | 9808          | 9870          | 1598                                     | 2056         | 1085         | 4291         | 6694         |
| Somerset County              | 16976                                   | 18200         | 11749         | 4823          | 6480          | 2584                                     | 2335         | 2068         | 2073         | 2299         |
| <b>Central East</b>          | <b>126921</b>                           | <b>140895</b> | <b>84282</b>  | <b>41016</b>  | <b>52998</b>  | <b>30144</b>                             | <b>23083</b> | <b>13984</b> | <b>10477</b> | <b>23110</b> |
| Middlesex County             | 41111                                   | 47684         | 28317         | 19096         | 22044         | 5549                                     | 3516         | 1968         | 1986         | 7421         |
| Monmouth County              | 31727                                   | 31263         | 21021         | 7852          | 9918          | 6038                                     | 3211         | 3680         | 3675         | 7661         |
| Ocean County                 | 22023                                   | 25950         | 15308         | 6968          | 9281          | 16730                                    | 14441        | 6953         | 2766         | 5506         |
| Union County                 | 32060                                   | 35998         | 19636         | 7100          | 11755         | 1827                                     | 1915         | 1383         | 2050         | 2522         |
| <b>Southwest</b>             | <b>67766</b>                            | <b>71754</b>  | <b>43034</b>  | <b>18070</b>  | <b>26565</b>  | <b>9093</b>                              | <b>7673</b>  | <b>6262</b>  | <b>3300</b>  | <b>7221</b>  |
| Burlington County            | 21295                                   | 24767         | 14598         | 5508          | 8775          | 3211                                     | 2108         | 1920         | 1311         | 2991         |
| Camden County                | 28437                                   | 27151         | 16395         | 6448          | 9761          | 3241                                     | 4065         | 2451         | 1244         | 2254         |
| Gloucester County            | 14784                                   | 16691         | 9845          | 5430          | 6651          | 2605                                     | 1118         | 1547         | 708          | 1655         |
| Salem County                 | 3250                                    | 3145          | 2196          | 684           | 1378          | 36                                       | 382          | 344          | 37           | 321          |
| <b>Southeast</b>             | <b>25772</b>                            | <b>32881</b>  | <b>16070</b>  | <b>8166</b>   | <b>8588</b>   | <b>2042</b>                              | <b>1595</b>  | <b>1196</b>  | <b>1160</b>  | <b>2481</b>  |
| Atlantic County              | 12364                                   | 16928         | 8575          | 5414          | 6146          | 1504                                     | 875          | 804          | 387          | 1371         |
| Cape May County              | 4616                                    | 4398          | 2639          | 335           | 735           | 129                                      | 252          | 65           | 335          | 500          |
| Cumberland County            | 8792                                    | 11555         | 4856          | 2417          | 1707          | 409                                      | 468          | 327          | 438          | 610          |
| <b>Statewide/State of NJ</b> | <b>443613</b>                           | <b>498359</b> | <b>290607</b> | <b>136674</b> | <b>174603</b> | <b>65287</b>                             | <b>56484</b> | <b>39505</b> | <b>39330</b> | <b>73508</b> |
